# Supplementary material for: Stroke patients’ knowledge, attitudes, and practices regarding home-based exercise and psychological rehabilitation programs
Source: Front Med (Lausanne). 2025 Jun 26;12:1598489. doi: 10.3389/fmed.2025.1598489 (PMC12243871; doi:10.3389/fmed.2025.1598489)
Supplement: Supplementary file 1 [file Table_1.xlsx]

## Sheet: Sheet1
Table S1. Hospitals that participated in the survey
No	医院	Name
1	东南大学附属中大医院	Zhongda Hospital Sourheast University
2	淮安市第一人民医院	Huai'an First People's Hospital
3	淮安市第二人民医院	Huai'an Second People's Hospital
4	淮安市第五人民医院	The Fifth People's Hospital of Huai'an
5	淮安瑞济医院	Huai'an Ruiji Hospital
6	金湖县人民医院	Jinhu County People's Hospital
7	金湖县中医院	Jinhu County Hospital of Chinese Medicine
8	江苏省中医院	Jiangsu Province Hospital of Chinese Medicine
9	江阴市人民医院	Jiangyin People's Hospital
10	南京市第一医院	Nanjing First Hospital
11	南京市中医院	Nanjing Hospital of Chinese Medicine
12	苏州大学附属第一医院	The First Affiliated Hospital of Soochow University
13	无锡市惠山区人民医院	Wuxi Huishan District People's Hospital
14	徐州市中心医院	Xuzhou Central Hospital
15	徐州医科大学附属医院	The Affiliated Hospital of Xuzhou Medical University
16	盐城市大丰人民医院	Yancheng Dafeng People's Hospital
17	无锡市中医医院	Wuxi Hospital of Chinese Medicine
18	江苏省苏北人民医院	Subei People's Hospital of Jiangsu Province
19	江阴英智澄江康复医院	Jiangyin Yingzhi Chengjiang Rehabilitation Hospital
20	昆山市康复医院	Kunshan Rehabilitation Hospital
21	南京脑科医院	Nanjing Brain Hospital
22	徐州市中医院	Xuzhou City Hospital of Traditional Chinese Medicine
23	南京同仁医院	Nanjing Tongren Hospital
24	江苏钟山老年康复医院	Jiangsu Zhongshan Geriatric Rehabilitation Hospital
25	南京紫金医院	Nanjing Zijin Hospital
26	苏州瑞盛康复医院	Ruisheng Rehabilitation Hospital
27	苏州市中医医院	Suzhou Hospital of Traditional Chinese Medicine
28	泰州市中医院	Taizhou Hospital of Chinese Medicine
29	无锡市同仁康复医院	Wuxi Tongren Rehabilitation Hospital
30	无锡耘林康复医院	Wuxi Yunlin Rehabilitation Hospital
31	无锡梓旺康复医院	Wuxi Ziwang Rehabilitation Hospital
32	新沂市人民医院	Xinyi People's Hospital
33	宿迁市康复医院	Suqian Rehabilitation Hospital
34	徐州矿务集团总医院	General Hospital of Xuzhou Mining Group
35	扬州市中医院	Yangzhou Hospital of Traditional Chinese Medicine
36	张家港市中医医院	Zhangjiagang Hospital of Traditional Chinese Medicine
37	镇江市中西医结合医院	Zhenjiang Hospital of Integrated Traditional Chinese and Western Medicine
